1 **First record of monogenean fish parasites in the Upper Lufira basin**  
2 **(Democratic Republic of Congo): dactylogyrids and gyrodactylids infecting**  
3 ***Oreochromis mweruensis*, *Coptodon rendalli* and *Serranochromis***  
4 ***macrocephalus* (Teleostei: Cichlidae)**

5 **Gyrhaiss Kapepula Kasembele<sup>1\*</sup>, Auguste Chocha Manda<sup>1</sup>, Emmanuel Abwe<sup>1,2,5</sup>, Antoine**  
6 **Pariselle<sup>3</sup>, Fidel Muterezi Bukinga<sup>4</sup>, Tine Huyse<sup>2,5</sup>, Michiel W.P. Jorissen<sup>2,6</sup>, Emmanuel J.**  
7 **Vreven<sup>2</sup>, Wilmien J. Luus-Powell<sup>7</sup>, Willem Smit<sup>7</sup>, Joseph Roderick Sara<sup>7</sup>, Jos Snoeks<sup>2,5</sup> and**  
8 **Maarten P.M. Vanhove<sup>2,5,6,8,9,10</sup>**

9 <sup>1</sup> Unité de Recherche en Biodiversité et Exploitation durable des Zones Humides (BEZHU),  
10 Faculté des Sciences Agronomiques, Université de Lubumbashi, Haut-Katanga, Democratic  
11 Republic of Congo ;

12 <sup>2</sup> Department of Biology, Royal Museum for Central Africa, Leuvensesteenweg 13, BE-3080  
13 Tervuren, Belgium;

14 <sup>3</sup> ISEM, Univ Montpellier, CNRS, IRD, Montpellier, France; Faculty of Sciences, Mohammed V  
15 University in Rabat, Rabat, Morocco;

16 <sup>4</sup> Section de Parasitologie, Département de Biologie, Centre de Recherche en Hydrobiologie,  
17 Uvira, Democratic Republic of Congo ;

18 <sup>5</sup> Laboratory of Biodiversity and Evolutionary Genomics, Department of Biology, University of  
19 Leuven, Ch. Deberiotstraat 32, BE-3000 Leuven, Belgium;

20 <sup>6</sup> Research Group Zoology: Biodiversity & Toxicology, Centre for Environmental Sciences,  
21 Hasselt University, BE-3590 Diepenbeek, Belgium;

22 <sup>7</sup> DSI-NRF SARChI Chair (Ecosystem Health), Department of Biodiversity, University of  
23 Limpopo, Private Bag X1106, Sovenga, 0727, South Africa;

24 <sup>8</sup> Capacities for Biodiversity and Sustainable Development, Operational Directorate Natural  
25 Environment, Royal Belgian Institute of Natural Sciences, Vautierstraat 29, 1000 Brussels,  
26 Belgium;

27 <sup>9</sup> Department of Botany and Zoology, Faculty of Science, Masaryk University, Kotlářská 2, CZ-  
28 611 37 Brno, Czech Republic;

29 <sup>10</sup> Zoology Unit, Finnish Museum of Natural History, University of Helsinki, P.O.Box 17,  
30 Helsinki FI-00014, Finland.

31 \*Correspondence: [jrskasembele@gmail.com](mailto:jrskasembele@gmail.com)

32 GKK: [jrskasembele@gmail.com](mailto:jrskasembele@gmail.com)

33 ACM: [augustechocha@gmail.com](mailto:augustechocha@gmail.com)

34 EA: [emmanuelabwe@gmail.com](mailto:emmanuelabwe@gmail.com)

35 AP: [antoine.pariselle@ird.fr](mailto:antoine.pariselle@ird.fr)

36 FMB: [fidel.muterezi@gmail.com](mailto:fidel.muterezi@gmail.com)

37 TH: [Tine.Huyse@africamuseum.be](mailto:Tine.Huyse@africamuseum.be)

38 MWPJ: [michiel.jorissen@uhasselt.be](mailto:michiel.jorissen@uhasselt.be)

39 EJV: [emmanuel.vreven@kuleuven.be](mailto:emmanuel.vreven@kuleuven.be)

40 WJLP: [wilmien.powell@ul.ac.za](mailto:wilmien.powell@ul.ac.za)

41 WS: [willem.smit@ul.ac.za](mailto:willem.smit@ul.ac.za)

42 JRS : [joseph.sara@ul.ac.za](mailto:joseph.sara@ul.ac.za)

43 JS : [jos.snoeks@kuleuven.be](mailto:jos.snoeks@kuleuven.be)

44 MPMV : [maarten.vanhove@uhasselt.be](mailto:maarten.vanhove@uhasselt.be)

## 45 **Abstract**

46 **Background:** Monogenean parasites have never been formally reported on fish from the Lufira  
47 basin. Then it is hypothesised that multiple monogenean species are to be recorded that are new  
48 to the region. This study aimed to record the gill monogenean parasite fauna of three cichlid fish  
49 species in the Upper Lufira basin by inventorying their diversity (species composition) and  
50 analysing their infection parameters (prevalence, mean intensity and abundance).

51 **Methods:** *Oreochromis mweruensis*, *Coptodon rendalli*, and *Serranochromis macrocephalus*  
52 were selected for the study, given their economic value and their abundance in the Upper Lufira  
53 basin. Monogeneans were isolated from the gills and stomach, mounted on glass slides with  
54 either Hoyer's medium or ammonium picrate-glycerin for further identification under a  
55 stereomicroscope, based on morphological analysis of genital and haptor hard parts. Indices of  
56 diversity and infections parameters were calculated.

57 **Results:** A total of thirteen gill monogenean parasite species (*Cichlidogyrus dossoui*, *C. halli*, *C.*  
58 *karibae*, *C. mbirizei*, *C. papernastrema*, *C. quaestio*, *C. sclerosus*, *C. tiberianus*, *C. tilapiae*, *C.*  
59 *zambezensis*, *Scutogyrus gravivaginus*, *S. cf. bailloni* and *Gyrodactylus nyanzae*) and one  
60 stomach monogenean (*Enterogyrus malmbergi*) were reported. A species richness of S= 10 for

61 *O. mweruensis*, S= 6 for *C. rendalli* and S= 2 for *S. macrocephalus* were recorded. Five parasite  
62 species were reported to be common amongst *O. mweruensis* and *C. rendalli*. The most prevalent  
63 parasite species were *C. halli* (P= 80.9%) on *O. mweruensis*, *C. dossoui* (P= 92.9%) on *C.*  
64 *rendalli* and *C. karibae* and *C. zambezensis* (both of which P = 9.1%) on *S. macrocephalus* with  
65 a respective mean infection intensity of 7.9 on *O. mweruensis*, 9.8 on *C. rendalli* and 5 and 15,  
66 respectively, on *S. macrocephalus*. Results of this study reported new host ranges for five  
67 parasites species (*C. quaestio*, *S. cf. bailloni*, *E. malmbergi* on *O. mweruensis*, *C. halli* on *C.*  
68 *rendalli* and *C. karibae* on *S. macrocephalus*) as well as new geographical records for three of  
69 them (*S. cf. bailloni*, *E. malmbergi*, *C. karibae*).

70 **Conclusions:** This study highlights the richness of monogenean communities in the Upper Lufira  
71 basin and is a starting point for future helminthological studies, e.g. on the use of fish parasites as  
72 indicators of anthropogenic impacts.

73 **Keywords:** Lake Tshangalele, Haut-Katanga, *Cichlidogyrus*, *Enterogyrus*, *Gyrodactylus*,  
74 *Scutogyrus*

## 75 **Background**

76 Across the African continent, the Congo basin harbours the greatest species richness of fish [1-  
77 2]. The Congo basin covers 3,747 320 km<sup>2</sup>, and drains most of the Democratic Republic of  
78 Congo and parts of some of its bordering countries (Angola, Zambia, Tanzania, Burundi,  
79 Rwanda, Central African Republic and Republic of Congo) and a small part of Cameroon [3].  
80 The Congo basin includes different types of habitats and is subdivided into sections: Upper  
81 Congo (called Lualaba), Middle Congo, and Lower Congo [2,4-5]. One of the major tributaries  
82 in the Upper Congo drainage is the Lufira River [6]. The Lufira River is subdivided into three

83 sections: the Upper Lufira (from the source of the river to Lake Koni), the Middle Lufira (from  
84 downstream Lake Koni to the Kyubo Falls), and the Lower Lufira (from downstream the Kyubo  
85 Falls to the Kamalondo Depression, at the junction with the Lualaba River) [5,7]. In order to  
86 provide hydroelectric power, two successive dams were built in the Upper Lufira River; this  
87 created two artificial Lakes, Tshangalele (1930) and Koni (1949) [8-10]. Lake Tshangalele,  
88 located about 35 km east of the town of Likasi, holds a variety of fish, and it is also an UNESCO  
89 Man and the Biosphere Reserve, rich in birdlife [11-12]. In the Lufira River, most studies  
90 undertaken on biodiversity focused on vertebrates such as fish and birds [13-16]. Vast and  
91 speciose communities, which are often dominated by less sizeable animals such as flatworms or  
92 various parasite taxa, remain understudied, as is the case all over the world [17-18]. In view of  
93 the high biodiversity of potential host species in the tropics, it can be expected that  
94 parasitological surveys there would lead to the recording of many parasite species, including  
95 species new to science [19-20]. This study focuses on monogenean fish parasites due to their  
96 diversity, wide distribution, high host-specificity and single-host lifecycle, rendering them  
97 interesting models for studying the extent of parasite biodiversity and the underlying  
98 diversification mechanisms [21]. Monogeneans are common parasitic flatworms  
99 (Platyhelminthes) mostly infecting fish, and sporadically aquatic invertebrates, amphibians,  
100 reptiles and a single species of mammal (the hippopotamus) [22-27]. Infection sites of  
101 monogeneans on fish are typically gills, fins and/or skin [28], however they are also found rarely  
102 in the stomach, urinary bladder, intestine, oral or nasal cavity, eyes and heart [29-30]. Because of  
103 their one-host lifecycle and their close relationship with their host species, many monogeneans  
104 are specialists, infesting only a single host species (oioxenous specificity), though others are  
105 generalists, infesting two or more host species (stenoxenous specificity) [31-33]. Mendlová and

106 Šimková [34] used a more extensive number of categories of host specificity on the basis of the  
107 phylogenetic relationships among (cichlid) host species. Parasites can be: (1) strict specialists  
108 when infecting only one host species; (2) intermediate specialists when infecting two or more  
109 congeneric host species; (3) intermediate generalists when infecting noncongeneric cichlid  
110 species belonging to the same tribe; and finally (4) generalists, when infecting noncongeneric  
111 cichlid species of at least two different tribes. African cichlids (taking also into account the  
112 Levant) are known to harbour monogenean parasites belonging to six genera: *Enterogyrus*  
113 Paperna, 1963; *Urogyrus* Bilong Bilong, Birgi & Euzet, 1994; *Onchobdella* Paperna, 1968;  
114 *Scutogyrus* Pariselle & Euzet, 1995; *Cichlidogyrus* Paperna, 1960 (Dactylogyridea) and  
115 *Gyrodactylus* von Nordmann, 1832 (Gyrodactylidea). The latter four are ectoparasitic genera,  
116 and among them, *Cichlidogyrus* is the most species-rich group with more than 138 nominal  
117 species described to date [35-37]. This study aims to record the monogenean parasite fauna of  
118 three cichlid fishes in the Upper Lufira basin; these parasites were never formally reported from  
119 this region. Objectives include: (i) inventorying the diversity of gill monogenean communities,  
120 and (ii) analyzing infection parameters of these monogenean parasites.

## 121 **Methods**

### 122 **Study area**

123 This study was conducted in the Upper Lufira basin (Figure 1), which is localized across  
124 the mining hinterland area in the west of the Haut-Katanga province (in the south of the  
125 former Katanga province). The climate is of type AW6 following the classification of  
126 Köppen [38], a rainy tropical climate with a rainy season extending from November to  
127 April [39]. Most precipitation falls from December to March [40]. Fishing is done

128 essentially for *Coptodon rendalli* (Boulenger, 1896), *Oreochromis mweruensis*  
129 Trewavas, 1983, *Serranochromis macrocephalus* Boulenger, 1899, *Clarias gariepinus*  
130 (Burchell, 1822) and *Clarias ngamensis* (Castelnau, 1861) [12, 41]. Captured fish are  
131 intended for human consumption, for a small part by the local population around the  
132 Upper Lufira basin, and for most part in bigger towns such as Likasi and Lubumbashi.

### 133 **Fish sampling**

134 Three fish species, *Oreochromis mweruensis*, *Coptodon rendalli* and *Serranochromis*  
135 *macrocephalus* were selected for the study, given their economic value and their abundance in  
136 the Upper Lufira basin [12, 41]. Fish were collected using nets or were bought from fishermen  
137 along the shores of the Lufira River, Lake Tshangalele and Lake Koni (Figure 1) between  
138 September 2015 and August 2018. Fish were kept alive in an aerated tank, and transported to a  
139 field laboratory. Fish were identified up to the species level following the keys by Skelton [42]  
140 and Lamboj [43]. Fish were killed by severing the spinal cord just posterior to the cranium,  
141 immediately prior to examination, following Olivier *et al.* [44]. Fish were processed as the total  
142 length (TL) and the standard length (SL) were measured to the nearest centimetre, and the weight  
143 was taken in gram for each fish.

### 144 **Parasite sampling**

145 To collect monogenean parasites, fish were dissected and the right gill arches removed by dorso-  
146 ventral section. One fish amongst all the fishes sampled was randomly dissected and inspected  
147 for monogenean parasites in its stomach. Gill arches and the stomach were placed in a Petri-dish  
148 containing water for examination using a stereomicroscope Optica 4.0.0. Parasites were  
149 dislodged from the gill filaments using entomological needles and fixed between a slide and

150 cover slip into a drop of either Hoyer's medium or ammonium picrate-glycerin (a preparation  
151 described by Malmberg, 1957) according to Nack *et al.* [45]. Twenty-four hours later, coverslips  
152 were sealed using nail varnish. Parasites were deposited in the invertebrate collection of the  
153 Royal Museum of Central Africa (RMCA) under accession numbers XXX.

#### 154 **Monogenean community composition, indices of diversity and infection parameters**

155 Morphological identifications of the retrieved parasite specimens were conducted based on the  
156 sclerotized parts of the haptor, the male copulatory organ (MCO) and the vagina, using an Optica  
157 BA310 and a phase-contrast Olympus BX50 microscope. Parasite identification up to species  
158 level, and comparison with known congeners was based on García-Vásquez *et al.* [46-47],  
159 Přikrylová *et al.* [48-49], Gillardin *et al.* [50], Muterezi *et al.* [51], Pariselle and Euzet [35,52],  
160 and Fannes *et al.* [53]. Parasite diversity was summarized by the species richness index (S),  
161 indices of Shannon (H) and Equitability of Pielou (J). Infection parameters: prevalence (P), mean  
162 intensity (MI) and mean abundance (MA) were provided following definitions given by Margolis  
163 *et al.* [54] and Bush *et al.* [55]. Statistical analysis was performed using Past 3.1 software.

#### 164 **Results**

165 Fish processed for the study had different size and weight range. For *Oreochromis mweruensis*  
166 (n=47) the mean TL was  $18.2 \pm 4.1$  cm and  $14.6 \pm 3.2$  cm for the mean SL, and the mean weight  
167 was  $72.7 \pm 38.8$  g. For *Coptodon rendalli* (n = 28) the mean TL was  $15.1 \pm 2.8$  cm and  $12.0 \pm$   
168  $2.4$  cm for the mean SL, and the mean weight =  $72.7 \pm 38.8$  g. For *Serranochromis*  
169 *macrocephalus* (n = 11) the mean TL was  $16.9 \pm 3.4$  cm and  $14.0 \pm 2.8$  cm for the mean SL, and  
170 the mean weight was  $81.9 \pm 51.5$  g.



171 **Monogenean community composition and indices of diversity in the Upper Lufira basin**

172 Representatives of four genera of monogeneans, *Cichlidogyrus*, *Gyrodactylus* and *Scutogyrus*  
173 (on the gills) and *Enterogyrus* (in the stomach), were collected (Table 1). Among them were ten  
174 known species of *Cichlidogyrus*, one species of *Gyrodactylus*, two species of *Scutogyrus* and one  
175 species of *Enterogyrus*. Parasite diversity indices were reported to be 10, 6 and 2 for S; 1.5, 1.2  
176 and 0.6 for H; and 0.6, 0.8 and 0.8 for J respectively for *O. mweruensis*, *C. rendalli* and *S.*  
177 *macrocephalus*. The distribution of monogeneans per sampling period or per season is shown in  
178 Table 2.

179 **Infection parameters of monogenean parasites in the Upper Lufira basin**

180 Prevalence, mean intensity and mean abundance presented in this section take into account hosts  
181 grouped without seasonal subdivision.

182 The highest prevalences recorded was 80.9% for *C. halli* on *O. mweruensis*, 92.3% for *C.*  
183 *dossoui* on *C. rendalli*, and 9.1% for both *C. zambezensis* and *C. karibae* on *S. macrocephalus*. A  
184 low prevalence of 2.1% was recorded for *C. tiberianus*, *S. cf. bailloni* for *O. mweruensis*, and  
185 3.8% for *G. nyanzae* from *C. rendalli* (Figure 2).

186 For *G. nyanzae* the highest MI =  $8.7 \pm 9.9$  was recorded from *O. mweruensis* and a low of MI= 1  
187  $\pm 0$  from *C. rendalli*. Conversely *C. papernastrema* obtained a MI of  $17.1 \pm 24$  when examining  
188 the latter fish host. For *S. macrocephalus*, *C. karibae* was the parasite with the highest mean  
189 intensity (MI= 15) and *C. zambezensis* the lowest (MI= 5) (Figure 3).

190 The results regarding the mean abundance reveal that on *O. mweruensis*, *C. halli* (MA=  $6.4 \pm$   
191  $7.7$ ) is the most abundant species; on the gills of *C. rendalli*, *C. dossoui* ( $9.7 \pm 15.6$ ) is the most

192 abundant species; and the highest abundance of monogeneans on *S. macrocephalus* is  $1.4 \pm 4.5$   
193 per examined fish for *C. karibae* (Figure 4).

## 194 **Discussion**

195 This research was conducted to explore the monogenean parasite fauna of three economically  
196 important and abundant cichlid species in the Upper Lufira basin, a part of the Upper Congo  
197 basin. In this study thirteen gill and one stomach monogenean species were recorded. Parasite  
198 species were already reported from fish belonging to the genera *Oreochromis*, *Coptodon* and  
199 *Serranochromis* [35,51, 56]. Although few studies on monogenean parasites from the Congo  
200 basin have been conducted in the Lake Tanganyika, Bangweulu-Mweru, Upper Lualaba, Kasai,  
201 Lower Congo and Pool Malebo Ecoregions (*sensu* Thieme *et al.* [57]) (e.g. Vanhove *et al.* [58];  
202 Gillardin *et al.*, [50]; Muterezi *et al.* [51]; Jorissen *et al.* [56, 59-60]; Geraerts *et al.* [61]), this  
203 study is the first to record monogenean parasites in the Lufira basin.

204 The known host range of five parasite species is extended in this study. *Cichlidogyrus quaestio*,  
205 *S. cf. bailloni* and *E. malmbergi* were recorded for the first time from *O. mweruensis*; *C. halli*  
206 from *C. rendalli*; and *C. karibae* from *S. macrocephalus*. *Cichlidogyrus karibae* was described  
207 by Douëllou [62] on *Sargochromis codringtonii* (Boulenger, 1908) in Lake Kariba (Zambezi  
208 basin, Zimbabwe). *Enterogyrus malmbergi* was described by Bilong Bilong [63] from the  
209 stomach of *Oreochromis niloticus* (Linnaeus, 1758) in the Sanaga River (Cameroon). *Scutogyrus*  
210 *bailloni* was formally described by Pariselle and Euzet [52] on *Sarotherodon galilaeus* (L, 1758)  
211 in the Mékrou River (Niger basin, Niger, West Africa). Since only a single similar parasite  
212 specimen was retrieved in this study on the gills of *O. mweruensis*, it cannot be assigned to *S.*  
213 *bailloni* with certainty. Nevertheless these (putative in case of *S. bailloni*) records substantially

214 expand the known geographical distribution of these three monogenean species. Considering  
215 species richness, our results are similar to previous reports of monogenean gill parasites for these  
216 fishes in the Congo basin. In this study, ten monogenean species were found on *O. mweruensis*,  
217 while Jorissen *et al.* [56, 59] collected nine parasite species in the Bangweulu-Mweru ecoregion  
218 on *O. mweruensis* (of which seven are shared, except for *Cichlidogyrus mbirizei*, *C. quaestio* and  
219 *S. cf. bailloni* on *O. mweruensis* from the Lufira river system, and *C. cirratus* and *C.*  
220 *papernastrema* on *O. mweruensis* from the Bangweulu-Mweru ecoregion). Six monogenean  
221 species were found on *C. rendalli* in this study, while Jorissen *et al.* [59] collected five parasite  
222 species (all but *C. halli* corresponding to those found in this study) in the Bangweulu-Mweru  
223 ecoregion. On *S. macrocephalus*, two monogenean species (*C. karibae* and *C. zambezensis*) were  
224 found in this study while Jorissen *et al.* [59] reported only the last species, on fewer host fish.  
225 In terms of infection parameters, on *O. mweruensis*, one parasite species had a prevalence higher  
226 than 50% in the Upper Lufira basin (*C. halli*, P= 80.9%) against two monogenean species in the  
227 Bangweulu-Mweru reported by Jorissen *et al.* [59] (P= 57.1% for *C. dossoui* and *S.*  
228 *gravivaginus*). On *C. rendalli*, *C. dossoui* (P= 92.3%) in the Upper Lufira basin, and *C. dossoui*,  
229 *C. quaestio* and *C. tiberianus* in the Bangweulu-Mweru, have P>50% following comparison with  
230 Jorissen *et al.* [59]. On *S. macrocephalus*, no parasite species had a prevalence higher than 50%  
231 in the Upper Lufira basin, while *C. zambezensis* reaches a prevalence of 100% in the  
232 Bangweulu-Mweru. Regarding the infection intensity (Table 1), on *O. mweruensis*, in the Upper  
233 Lufira basin, the most infected fish harbour up to 30 specimens of *C. halli*, followed by 25  
234 specimens of *G. nyanzae*, against 37 parasite specimens of *G. nyanzae* and 21 parasite specimens  
235 of *C. cirratus* in Bangweulu-Mweru (reported by Jorissen *et al.* [59]). On *C. rendalli* in the  
236 Upper Lufira basin, the most infected fish harboured up to 84 specimens of *C. papernastrema*,

237 followed by *C. dossoui* with 68 monogenean specimens against respectively 29 and 20  
238 specimens of *C. dossoui* and *C. quaestio* in the Bangweulu-Mweru Ecoregion. Finally, on *S.*  
239 *macrocephalus* in the Upper Lufira, the most infected fish contain up to 15 and 5 parasite  
240 specimens of *C. karibae* and *C. zambezensis* respectively while Jorissen *et al.* [59] reported 21  
241 parasite specimens of *C. zambezensis* in the Bangweulu Mweru. These differences in infection  
242 parameters may be due to sample size, season, biogeographical distribution or other  
243 environmental parameters, as communities of cichlid-infecting monogeneans have been observed  
244 to fluctuate e.g. seasonally and between habitat types, and parasite species composition may  
245 change between areas and basins [64-66].

## 246 **Conclusion**

247 We reported stomach and gill monogenean species richness and infection parameters from three  
248 cichlid species in the Upper Lufira basin. A total of 13 monogenean species were recovered from  
249 *O. macrochir*, *C. rendalli* and *S. macrocephalus*. These findings are the first record of  
250 monogeneans in the Upper Lufira basin. For future sampling, it will also be interesting to study  
251 other groups of fish parasites other than monogenean parasites, as well as other fish species or  
252 families, to record the diversity of parasites [56, 59]. In addition, parasites can also be used as  
253 bioindicators of water quality [67-69] in this ecosystem where there is a substantial  
254 anthropogenic threat, especially from mine pollution [70-71]. The use of parasites as  
255 bioindicators of environmental conditions has been applied previously on African cichlids [72].  
256 This study can serve as a baseline whereby future studies conducted on fish from the Upper  
257 Lufira basin can be compared to this study so as to establish if there has been a change in  
258 parasite composition and parasite load over time.

## 259 **Acknowledgements**

260 VLIR-UOS is thanked for supporting this study through the South Initiative « *Renforcement des*  
261 *capacités locales pour une meilleure évaluation biologique des impacts miniers au Katanga (RD*  
262 *Congo) sur les poissons et leurs milieux aquatiques* », the local team of the University of  
263 Lubumbashi (BEZHU) namely C. Kalombo Kabalika, P. Kiwele Mutambala, B. Katemo Manda,  
264 M. Kasongo Ilunga Kayaba and C. Mukweze Mulelenu for their help in fish sampling, the  
265 international team, I. Přikrylová, for her contribution in confirmation of parasite identification,  
266 and F.A.M. Volckaert (KU Leuven) and L. Janssens de Bisthoven (Royal Belgian Institute of  
267 Natural Sciences) for hosting G.K. Kasembele in their teams during his respective research visits  
268 to Belgium. Finally, we thank the *Institut Congolais pour la Conservation de la Nature* (ICCN)  
269 for facilitating and authorising sampling.

## 270 **Funding**

271 This research was carried out with the funding support of a VLIR-UOS South Initiative  
272 (ZRDC2014MP084); at the time of conducting this investigation, M.P.M Vanhove was  
273 supported by the Belgian Directorate-General for Development Cooperation and Humanitarian  
274 Aid [CEBioS program: Capacities for Biodiversity and Sustainable Development], and currently  
275 by the Special Research Fund of Hasselt University (BOF20TT06). The South African team was  
276 supported by the South African Research Chairs Initiative of the Department of Science and  
277 Innovation and National Research Foundation of South Africa (Grant No 101054).

## 278 **Availability of data and materials**

279 Slides of monogenean parasites are available in the invertebrate collection of the Royal Museum  
280 of Central Africa, Tervuren, Belgium.

### 281 **Authors' contributions**

282 ACM, JS and MPMV designed and supervised this study. ACM, EA, EJV contributed to  
283 sampling, the collection and identification of fish. FMB, WJLP, WS, JRS and MPMV helped  
284 with the collection and preparation of the gill parasites. AP, MWPJ, MPMV helped with the  
285 morphological identification of parasites species. MPMV helped with the writing of the paper,  
286 analysis of the data, interpretation and discussion of results and provided scientific background  
287 in the field of monogenean research. All the authors critically read and edited the manuscript,  
288 and approved the final manuscript.

### 289 **Ethics approval and consent to participate**

290 Fish were collected using nets or were bought from fishermen. In the absence of relevant animal  
291 welfare regulations in the DRC, we had used the guidelines and authorization in accordance with  
292 the Unité de Recherche en Biodiversité et Exploitation durable des Zones Humides (BEZHU) of  
293 the Université de Lubumbashi

### 294 **Consent for publication**

295 Not applicable

### 296 **Competing interests**

297 The authors declare that they have no known competing financial interests or personal  
298 relationships that could have appeared to influence the work reported in this paper.

## 299 **References**

- 300 1. Shumway C, Musibono D, Ifuta S, Sullivan J, Schelly R, Punga J, et al. Biodiversity Survey:  
301 Systematics, Ecology, and Conservation along the Congo River. Congo River Environment and  
302 Development Project (CREDP), 2003; 127p.
- 303 2. Teugels GG, Thieme ML. Biological distinctiveness of African Ecoregions: Freshwater Fish  
304 Biodiversity in the Congo basin. In: Thieme ML, Abell R, Skelton P, Lenher B, Teugels GG,  
305 Dinerstein E et al. editors. Freshwater ecoregions of Africa and Madagascar. Island Press; 2005.  
306 p. 35-70.
- 307 3. Runge J. The Congo River, Central Africa. In: Gupta A, editor. Large Rivers: Geomorphology  
308 and Management; 2007; 293-309.
- 309 4. Roberts TR, Stewart DJ. An ecological and systematic survey of fishes in the rapids of the  
310 Lower Zaïre or Congo River. *Bulletin Museum of Comparative Zoology*. 1976; 147(Suppl.  
311 6):239-317.
- 312 5. Brummett R, Stiassny M, Harrison I. Background. In: Brooks EGE, Allen DJ, Darwall WRT,  
313 editors. The Status and Distribution of Freshwater Biodiversity in Central Africa. Gland,  
314 Switzerland and Cambridge, UK: IUCN; 2011.
- 315 6. Stiassny MLJ, Brummett RE, Harrison IJ, Monsembula R, Mamonekene V. The status and  
316 distribution of freshwater fishes in central Africa. In: Brooks EGE, Allen DJ, Darwall WRT,

- 317 editors. The Status and Distribution of Freshwater Biodiversity in Central Africa. Gland,  
318 Switzerland and Cambridge, UK : IUCN ; 2011.
- 319 7. Poll M. Poissons recueillis au Katanga par H.J. Bredo. Bulletin du Musée royal d'Histoire  
320 naturelle de Belgique, Bruxelles, Tome XXIV, n° 21 ; 1948.
- 321 8. Damas H, Magis N, Nassogne A. Contribution à l'étude hydrobiologique des lacs  
322 Mwadingusha, Koni & N'zilo. Université de Liège. Fondation de l'université de Liège pour les  
323 recherches scientifiques au Congo et au Ruanda-Urundi 50p ; 1959.
- 324 9. Magis N. Nouvelle contribution à l'étude hydrobiologique des lacs de Mwadingusha, Koni et  
325 N'zilo. Université de Liège. Fondation de l'université de Liège pour les recherches scientifiques  
326 au Congo et au Ruanda-Urundi, 25p ; 1961.
- 327 10. Wilmet J. La répartition de la population dans la dépression des rivières Mufuvya et Lufira  
328 (Haut-Katanga). Université de Liège. Fondation de l'université de Liège pour les recherches  
329 scientifiques au Congo et au Ruanda-Urundi. Académie des sciences d'outre-mer, tome XIV,  
330 fasc. 2 ; 1963.
- 331 11. Doumenge C, Palla F, Scholte P, Hiol Hiol F, Larzillière A. Aires protégées d'Afrique  
332 centrale - État 2015. OFAC, Kinshasa, République Démocratique du Congo et Yaoundé,  
333 Cameroun : 256 p ; 2015.
- 334 12. Squadrone S, Burioli E, Monaco G, Koya MK, Prearo M, Gennero S, et al. Human exposure  
335 to metals due to consumption of fish from an artificial lake basin close to an active mining area  
336 in Katanga (D.R. Congo). *Sci Total Environ.* 2016; 568:679-684.



- 337 13. Louette M, Hasson M. Rediscovery of the Lake Lufira Weaver *Ploceus ruweti*. *Bulletin ABC*  
338 2009; 16(Suppl. 2): 168-173.
- 339 14. Craig AJFK, Hasson M, Jordaens K, Breman F, Louette M. Range extension of the Lufira  
340 Masked Weaver *Ploceus ruweti*, endemic to Katanga province, Democratic Republic of Congo.  
341 *OSTRICH* 2011; 82(Suppl. 1):77-78.
- 342 15. Ilunga MK, Abwe E, Decru E, Manda AC, Vreven E. Description of a new small-sized  
343 *Synodontis* species (Siluriformes: Mochokidae) that is important for local subsistence fisheries in  
344 the middle Lufira (upper Congo River, DR Congo). *J Fish Biol.* 2019;1-18.
- 345 16. Mulelenu CM, Manda BK, Decru E, Manda AC, Vreven E. The *Cyphomyrus* Myers 1960  
346 (Osteoglossiformes: Mormyridae) of the Lufira basin (Upper Lualaba: DR Congo): A generic  
347 reassignment and the description of a new species. *J Fish Biol.* 2020; 1-19.
- 348 17. Fonseca VG, Carvalho GR, Sung W, Johnson HF, Power DM, Neill SP, et al. Second-  
349 generation environmental sequencing unmask marine metazoan biodiversity. *Nat Commun.*  
350 2010; 1:98.
- 351 18. Vanhove MPM, Tessens B, Schoelinck C, Jondelius U, Littlewood DTJ, Artois T, et al..  
352 Problematic barcoding in flatworms: A case-study on monogeneans and rhabdocoels  
353 (Platyhelminthes). *ZooKeys.* 2013; 365:355-379.
- 354 19. Whittington ID. Diversity “down under”: monogeneans in the antipodes (Australia) with a  
355 prediction of monogenean biodiversity worldwide. *Int J Parasitol.* 1998; 28:1481-1493.
- 356 20. Vanhove MPM, Snoeks J, Volckaert FAM, Huyse T. First description of monogenean  
357 parasites in Lake Tanganyika: the cichlid *Simochromis diagramma* (Teleostei, Cichlidae)

- 358 harbours a high diversity of *Gyrodactylus* species (Platyhelminthes, Monogenea). Parasitology.  
359 2011; 138:364-380 (Erratum in 138: 403).
- 360 21. Pariselle A, Morand S, Deveney MR, Pouyau L. Parasite species richness of closely related  
361 hosts: historical scenario and “genetic” hypothesis, p. 147-166. In: Combes C, Jourdan J, editors.  
362 Hommage à Louis Euzet - Taxonomie, écologie et évolution des métazoaires parasites.  
363 Taxonomy, ecology and evolution of metazoan parasites. Perpignan, Les Presses Universitaires  
364 de Perpignan, 2003. P. 380+396.
- 365 22. Thurston JP. The larva of *Oculotrema hippopotami* (Monogenea: Polystomatidae. J Zool.  
366 1968; 154:475-480.
- 367 23. Thurston JP. The frequency distribution of *Oculotrema hippopotami* (Monogenea:  
368 Polystomatidae) on *Hippopotamus amphibus*. J. Zool. 1968 ;154:481-485.
- 369 24. Silan P, Langlais M, Latu G. Dynamique des populations de monogènes, ectoparasites de  
370 téléostéens : Stratégies démographiques et implications mathématiques. *Ecologie*, t. 1999  
371 ;30(Suppl. 4) :1.
- 372 25. Silan P, Caltran H, Latu G. Ecologie et dynamique des populations de monogènes,  
373 ectoparasites de téléostéens marins : approche et contribution montpelliéraines. Taxonomie,  
374 écologie et évolution des métazoaires parasites. In: Combes C, Jourdan J, editors. PUP, France,  
375 Perpignan Tome II. 2003;212-235.
- 376 26. Whittington ID, Cribb BW, Hamwood TE, Halliday JA. Host-specificity of monogenean  
377 (platyhelminth) parasites: a role for anterior adhesive areas? Int J Parasitol. 2000; 30:305-320.

- 378 27. Ozturk T, Ozer A. Monogenean Fish Parasites, Their Host Preferences and Seasonal  
379 Distributions in the Lower Kizilirmak Delta (Turkey). Turk J Fish Aquat Sc. 2014; 14:367-378.
- 380 28. Bagge AM. Factors affecting the development and structure of monogenean communities on  
381 Cyprinid fish. Dissertation, University of Jyvaskyla 25p; 2005.
- 382 29. Llewellyn J. Amphidellid (monogenean) parasites of electric rays (Torpedinidae). J Mar  
383 Biol Assoc UK. 1960; 39:561-589.
- 384 30. Euzet L, Combes C. The selection of habitats among the monogenean. Int J Parasitol. 1998;  
385 28:1645-1652.
- 386 31. Jarkovský J, Morand S, Šimková A, Gelnar M. Reproductive barriers between congeneric  
387 monogenean parasites (Dactylogyrus: Monogenea): attachment apparatus morphology or  
388 copulatory organ incompatibility? Parasitol Res. 2004; 92:95-105.
- 389 32. Šimková A, Verneau O, Gelnar M, Morand S. Specificity and specialization of congeneric  
390 monogeneans parasitizing cyprinid fish. Evolution. 2006;60(Suppl. 5):1023-1037.
- 391 33. Řehulková E, Mendlova M, Šimková A., Two new species of *Cichlidogyrus* (Monogenea:  
392 Dactylogyridae) parasitizing the gills of African cichlid fishes (Perciformes) from Senegal:  
393 morphometric and molecular characterization. Parasitol Res. 2013; 112:1399-1410.
- 394 34. Mendlová M, Šimková A. Evolution of host specificity in monogeneans parasitizing African  
395 cichlid fish. Parasite Vector. 2014; 7:69.
- 396 35. Pariselle A, Euzet L. Systematic revision of dactylogyridean parasites (Monogenea) from  
397 cichlid fishes in Africa, the Levant and Madagascar. Zoosystema. 2009;31(Suppl. 4):849-898.

- 398 36. Řehulková E, Seifertová M, Přikrylová I, Francová K. Monogenea. In: Scholz T, Vanhove  
399 MPM, Smit N, Jayasundera Z, Gelnar M, editors. *Abc Taxa: A Guide to the Parasites of African*  
400 *Freshwater Fishes*. 2018; Volume 18.
- 401 37. Cruz-Laufer AJ, Artois T, Smeets K, Pariselle A, Vanhove MPM. The cichlid–Cichlidogyrus  
402 network: a blueprint for a model system of parasite evolution. *Hydrobiologia*. 2021; 848:3847-  
403 3863.
- 404 38. Kottek M, Grieser J, Beck C, Rudolf B, Rubel F. World Map of the Köppen-Geiger climate  
405 classification updated. *Meteorol Z*. 2006 ; 15(Suppl. 3) :259-263.
- 406 39. Katemo MB. Evaluation de la contamination de la chaîne trophique par les métaux lourds  
407 dans le bassin de la Lufira supérieure (Katanga/RD Congo). DEA en Biologie Végétale et  
408 Environnement. Université de Lubumbashi. République Démocratique du Congo, 44p ; 2009.
- 409 40. SNC-LAVALIN International. Etude sur la restauration des mines de cuivre et de cobalt en  
410 République Démocratique du Congo, Rapport préliminaire M-6708 (603082), Montréal, p222 ;  
411 2003.
- 412 41. Goortz A, Margis N, Wilmet J. Les aspects biologiques, humains et économiques de la pêche  
413 dans le lac de barrage de la Lufira. Université de Liège. Fondation de l'université de Liège pour  
414 les recherches scientifiques au Congo et au Ruanda-Urundi, 127p ; 1961.
- 415 42. Skelton P. *Freshwater fishes of Southern Africa*. Struik Publishers, Cape Town, 395p; 2001.
- 416 43. Lamboj A. *The Cichlid fishes of western Africa*. Verlag B.S. editor. Germany 256p; 2004.

- 417 44. Olivier PAS, Luus-Powell WJ, Saayman JE. Report on some monogenean and clinostomid  
418 infestations of freshwater fish and waterbird hosts in Middle Letaba Dam, Limpopo Province,  
419 South Africa. Onderstepoort J Vet Res. 2009; 76:187-199.
- 420 45. Nack J, Bitja Nyom AR, Pariselle A, Bilong Bilong CF. New evidence of a lateral transfer of  
421 monogenean parasite between distant fish hosts in Lake Ossa, South Cameroon: the case of  
422 *Quadriacanthus euzeti* n. sp. J Helminthol.2015;90:455-459.
- 423 46. García-Vásquez A, Hansen H, Shinn AP. A revised description of *Gyrodactylus cichlidarum*  
424 Paperna, 1968 (Gyrodactylidae) from the Nile tilapia, *Oreochromis niloticus niloticus*  
425 (Cichlidae), and its synonymy with *G. niloticus* Cone, Arthur et Bondad-Reantaso, 1995. Folia  
426 Parasit. 2007; 54:129-140.
- 427 47. García-Vásquez A, Hansen H, Christison KW, Bron JE, Shinn AP. Description of three new  
428 species of *Gyrodactylus* von Nordmann, 1832 (Monogenea) parasitizing *Oreochromis niloticus*  
429 *niloticus* (L.) and *O. mossambicus* (Peters) (Cichlidae). Acta Parasitol. 2011;56(Suppl. 1):20-33.
- 430 48. Přikrylová I, Matějusková I, Musilová N, Gelnar M. *Gyrodactylus* species (Monogenea:  
431 Gyrodactylidae) on the cichlid fishes of Senegal, with the description of *Gyrodactylus ergensi* n.  
432 sp. from Mango tilapia, *Sarotherodon galilaeus* L. (Teleostei: Cichlidae). Parasitol Res. 2009;  
433 106:1-6.
- 434 49. Přikrylová I, Blazek R, Vanhove MPM. An overview of the *Gyrodactylus* (Monogenea:  
435 Gyrodactylidae) species parasitizing African catfishes, and their morphological and molecular  
436 diversity. Parasitol Res. 2012; 110:1185-1200.

- 437 50. Gillardin C, Vanhove MPM, Pariselle A, Huyse T, Volckaert FAM. Ancyrocephalidae  
438 (Monogenea) of Lake Tanganyika: II: description of the first *Cichlidogyrus* spp. Parasites from  
439 Tropheini fish hosts (Teleostei, Cichlidae). Parasitol Res. 2012; 110:305-313.
- 440 51. Muterezi BF, Vanhove MPM, Van Steenberge M, Pariselle A. Ancyrocephalidae  
441 (Monogenea) of Lake Tanganyika: III: *Cichlidogyrus* infecting the world's biggest cichlid and  
442 the non-endemic tribes Haplochromini, Oreochromini and Tylochromini (Teleostei, Cichlidae).  
443 Parasitol Res. 2012; 111:2049-2061.
- 444 52. Pariselle A, Euzet L. *Scutogyrus* gen. n. (Monogenea: Ancyrocephalidae) for *Cichlidogyrus*  
445 *longicornis minus* Dossou, 1982, *C. l. longicornis*, and *C. l. gravivaginus* Paperna and Thurston,  
446 1969, with description of three new species parasitic on African Cichlids. Journal of  
447 helminthological society of Washington 1995;62(Suppl. 2):157-173.
- 448 53. Fannes W, Vanhove MPM, Huyse T. Redescription of *Cichlidogyrus tiberianus* Paperna,  
449 1960 and *C. dossoui* Douëllou, 1993 (Monogenea: Ancyrocephalidae), with special reference to  
450 the male copulatory organ. Syst Parasitol. 2017; 94:133-144.
- 451 54. Margolis L, Esch GW, Holmes JC, Kuris AM, Schad GA. The use of ecological terms in  
452 parasitology (Report of an ad hoc committee of the American society of parasitologists). J  
453 Parasitol. 1982;68(Suppl. 1):131-133.
- 454 55. Bush AO, Lafferty KD, Lotz JM, Shostak AW. Parasitology meets ecology on its own terms:  
455 Margolis *et al.* revisited. J Parasitol. 1997 ;83(Suppl. 4):575-583.

- 456 56. Jorissen MWP, Huyse T, Pariselle A, Wamuini Lunkayilakio S, Muterezi Bukinga F, Chocha  
457 Manda A, et al. Historical museum collections help detect parasite species jumps after tilapia  
458 introductions in the Congo basin. *Biol Invasions*. 2020. [https://doi.org/10.1007/s10530-020-](https://doi.org/10.1007/s10530-020-02288-4)  
459 02288-4.
- 460 57. Thieme ML, Abell R, Stiassny MLJ, Skelton P, Lehner B, Teugels GG, et al. *Freshwater*  
461 *Ecoregions of Africa and Madagascar. A Conservation Assessment*. Island Press, Washington,  
462 483p; 2005.
- 463 58. Vanhove MPM, Volckaert FAM, Pariselle A. Ancyrocephalidae (Monogenea) of Lake  
464 Tanganyika: I: Four new species of *Cichlidogyrus* from *Ophthalmotilapia ventralis* (Teleostei:  
465 Cichlidae), the first record of this parasite family in the basin. *Zoologia-Curitiba*. 2011  
466 ;28(Suppl. 2) :253-263.
- 467 59. Jorissen MWP, Pariselle A, Huyse T, Vreven EJ, Snoeks J, Volckaert FAM, et al. Diversity  
468 and host specificity of monogenean gill parasites (Platyhelminthes) of cichlid fishes in the  
469 Bangweulu-Mweru ecoregion. *J Helminthol*. 2018 ;92(Suppl. 4):417-437.
- 470 60. Jorissen MWP, Pariselle A, Huyse T, Vreven EJ, Snoeks J, Decru E, et al. Six new  
471 dactylogyrid species (Platyhelminthes, Monogenea) from the gills of cichlids (Teleostei,  
472 Cichliformes) from the Lower Congo basin. *Parasite*. 2018 ;25(Suppl. 64).
- 473 61. Geraerts M, Muterezi Bukinga F, Vanhove MPM, Pariselle A, Chocha Manda A, Vreven E,  
474 et al. Six new species of *Cichlidogyrus* Paperna, 1960 (Platyhelminthes: Monogenea) from the  
475 gills of cichlids (Teleostei: Cichliformes) from the Lomami River basin (DRC: Middle Congo).  
476 *Parasite Vector*. 2020; 13:187.

- 477 62. Douëllou L. Monogeneans of the genus *Cichlidogyrus* Paperna, 1960 (Dactylogyridae:  
478 Ancyrocephalinae) from cichlid fishes of Lake Kariba (Zimbabwe) with descriptions of five new  
479 species. Syst Parasitol. 1993; 25:159-185.
- 480 64. Morand S, Krasnov BR. The Biogeography of Host-parasite interactions. Oxford, UK:  
481 University Press; 2010.
- 482 65. Akoll P, Fioravanti ML, Konecny R, Schiemet F. Infection dynamics of *Cichlidogyrus*  
483 *tilapiae* and *C. sclerosus* (Monogenea, Ancyrocephalinae) in Nile tilapia (*Oreochromis niloticus*  
484 L.) from Uganda. J Helminthol. 2012; 86:302-310.
- 485 66. Igeh PC, Gilbert BM, Avenant-Oldewage A. Seasonal variance in water quality, trace metals  
486 and infection variables of *Cichlidogyrus philander* Douëllou, 1993 (Monogenea,  
487 Ancyrocephalidae) infecting the gills of *Pseudocrenilabrus philander* (Weber, 1897) in the  
488 Padda Dam, South Africa. Afr J Aquat Sci. 2020;1-12.
- 489 67. Sures B, Taraschewski H, Rydlo M. Intestinal fish parasites as heavy metal bioindicators: A  
490 comparison between *Acanthocephalus lucii* (Palaeacanthocephala) and the Zebra Mussel,  
491 *Dreissena polymorpha*. Bulletin of Environmental Contamination and Toxicology. 1997; 59:14-  
492 21.
- 493 68. Thielen F, Zimmermann S, Baska F, Taraschewski H, Sures B. The intestinal parasite  
494 *Pomphorhynchus laevis* (Acanthocephala) from barbel as a bioindicator for metal pollution in the  
495 Danube River near Budapest, Hungary. Environ Pollut. 2004;129 :421-429.
- 496 69. Sanchez-Ramirez C, Vidal-Martinez VM, Aguirre-Macedo ML, Rodriguez-Canul RP, Gold-  
497 Bouchot G, Sures B. *Cichlidogyrus sclerosus* (Monogenea: Ancyrocephalinae) and its host, the



- 498 Nile Tilapia (*Oreochromis niloticus*), as bioindicators of chemical pollution. *J Parasitol.* 2007  
499 ;93(Suppl. 5) :1097-1106.
- 500 70. Katemo MB, Colinet G, André L, Chocha MA, Marquet JP, Micha JC. Evaluation de la  
501 contamination de la chaîne trophique par les éléments traces (Cu, Co, Zn, Pb, Cd, U, V et As)  
502 dans le bassin de la Lufira supérieure (Katanga/RD Congo). *Tropicultura.* 2010 ;28(Suppl.  
503 4) :246-252.
- 504 71. Mees F, Masalehdani MNN, De Putter T, D'Hollander C, Van Biezen E, Mujinya BB, et al.  
505 Concentrations and forms of heavy metals around two ore processing sites in Katanga,  
506 Democratic Republic of Congo. *J Afr Earth Sci.* 2013; 77:22-30.
- 507 72. Madanire-Moyo GN, Luus-Powell WJ, Olivier PA. Diversity of metazoan parasites of the  
508 Mozambique tilapia, *Oreochromis mossambicus* (Peters, 1852), as indicators of pollution in the  
509 Limpopo and Olifants River systems. *Onderstepoort J Vet.* 2012;79(Suppl. 1) 362 [http://](http://dx.doi.org/10.4102/ojvr.v79i1.362)  
510 [dx.doi.org/10.4102/ojvr.v79i1.362](http://dx.doi.org/10.4102/ojvr.v79i1.362).

51

51

51

51

51

51

51

51

51

52

52

52

52

524

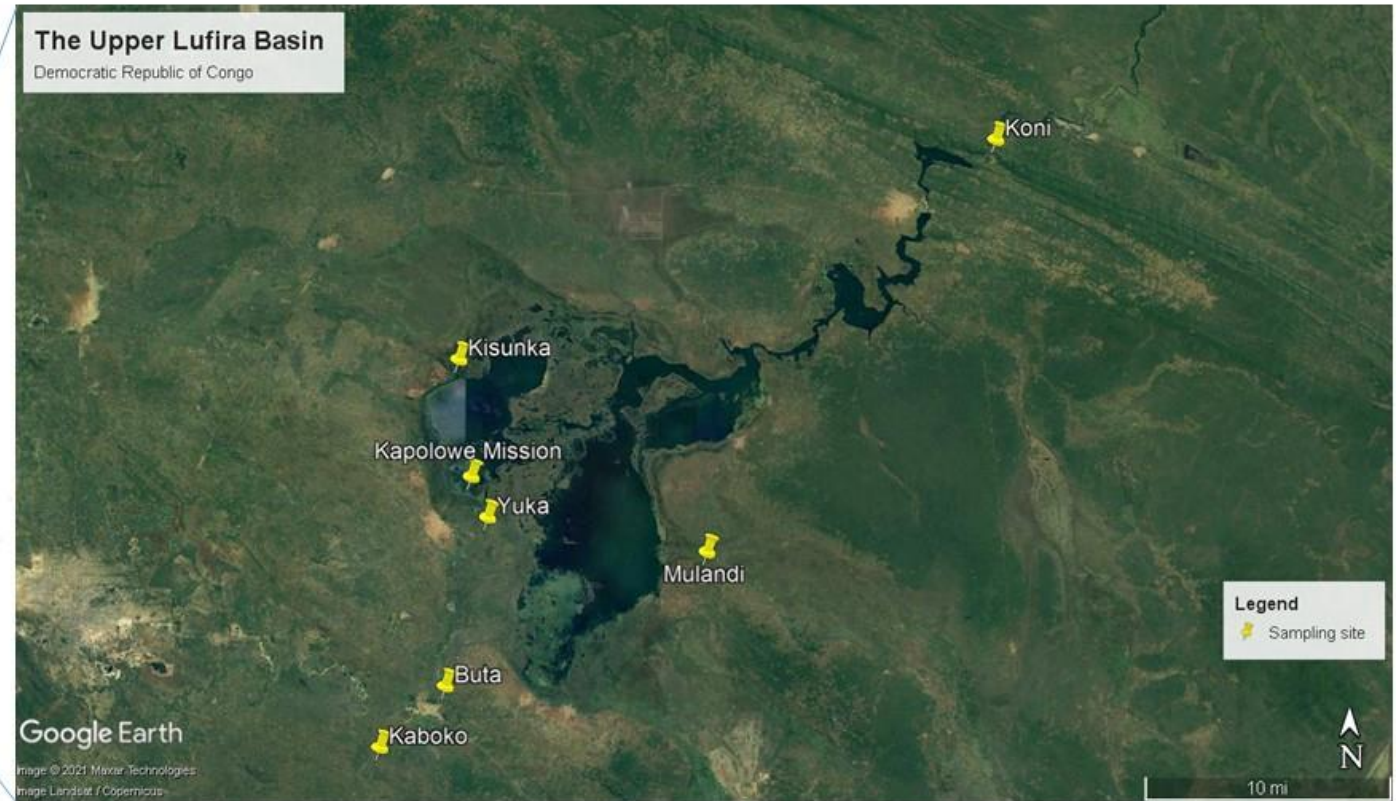

525 **Figure 1** : Map of sampling sites in the Upper Lufira basin: Lufira River (Kaboko 11°4'31.60"S; 26°55'2.40"E and Buta

526 11°2'21.60"S; 26°57'23.10"E); Lake Tshangalele (Kisunka 10°50'52.10"S; 26°57'50.60"E, Kapolowe Mission 10°54'59.50"S; 26°58'17.70"E,

527 Yuka 10°56'25.30"S; 26°58'53.40"E and Mulandi 10°57'36.64"S; 27°6'44.88"E) and Lake Koni (Koni 10°43'3.65"S; 27°17'3.24"E)

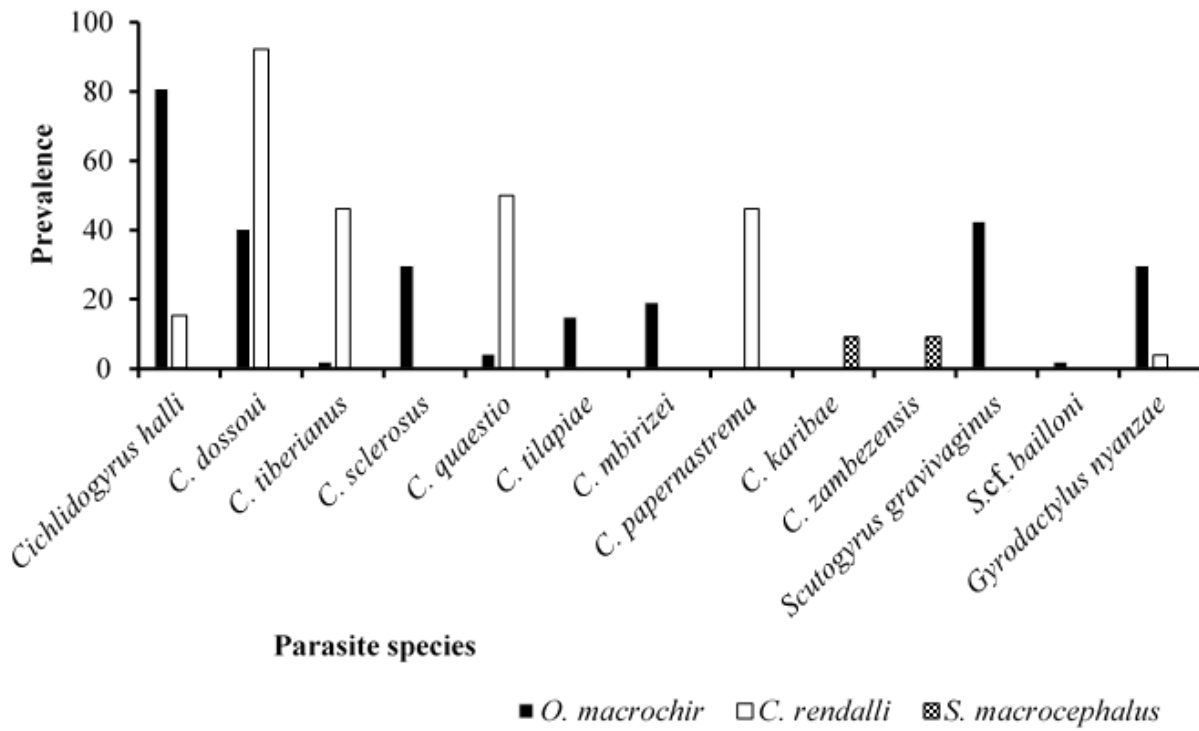

528

529 **Figure 2 :** Parasite prevalence (%) per monogenean species recovered on the gills of

530 *Oreochromis mweruensis*, *Coptodon rendalli* and *Serranochromis macrocephalus* in the Upper

531 Lufira basin

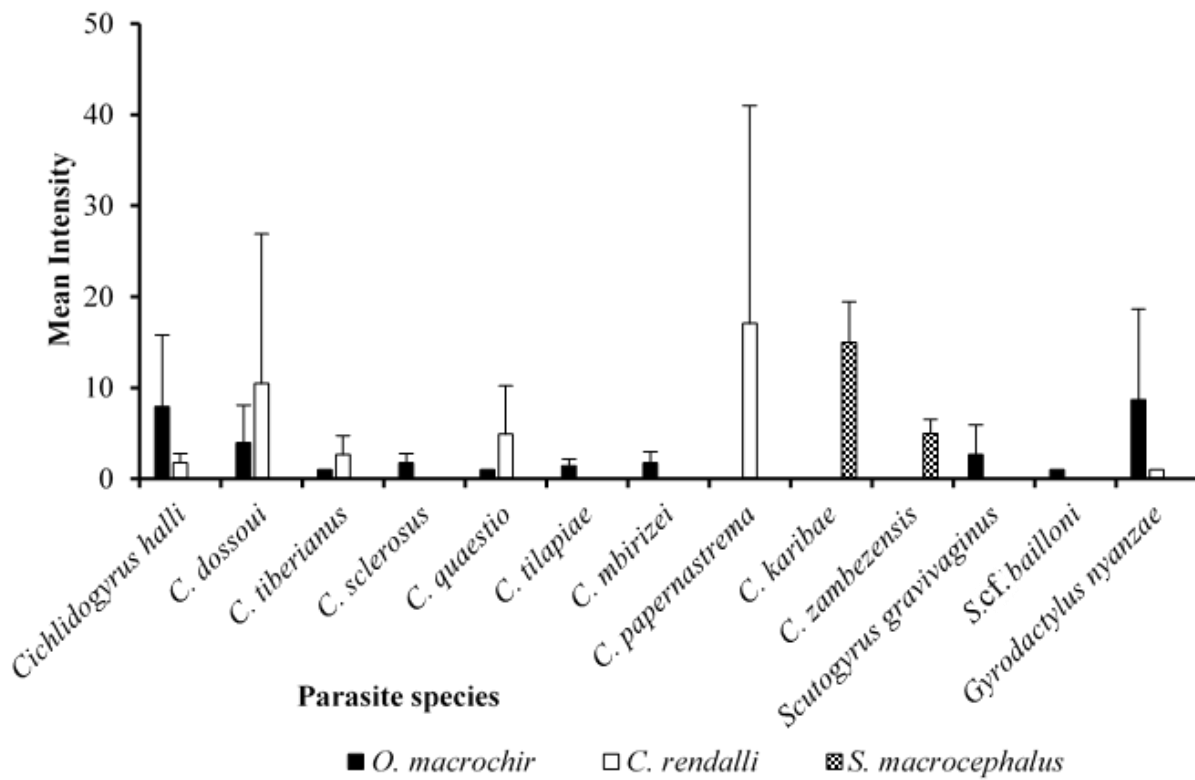

532

533 **Figure 3** : Mean intensity of each monogenean species recovered on the gills of *Oreochromis*  
534 *mweruensis*, *Coptodon rendalli* and *Serranochromis macrocephalus* in the Upper Lufira basin,  
535 with bars about the mean indicating the standard deviation

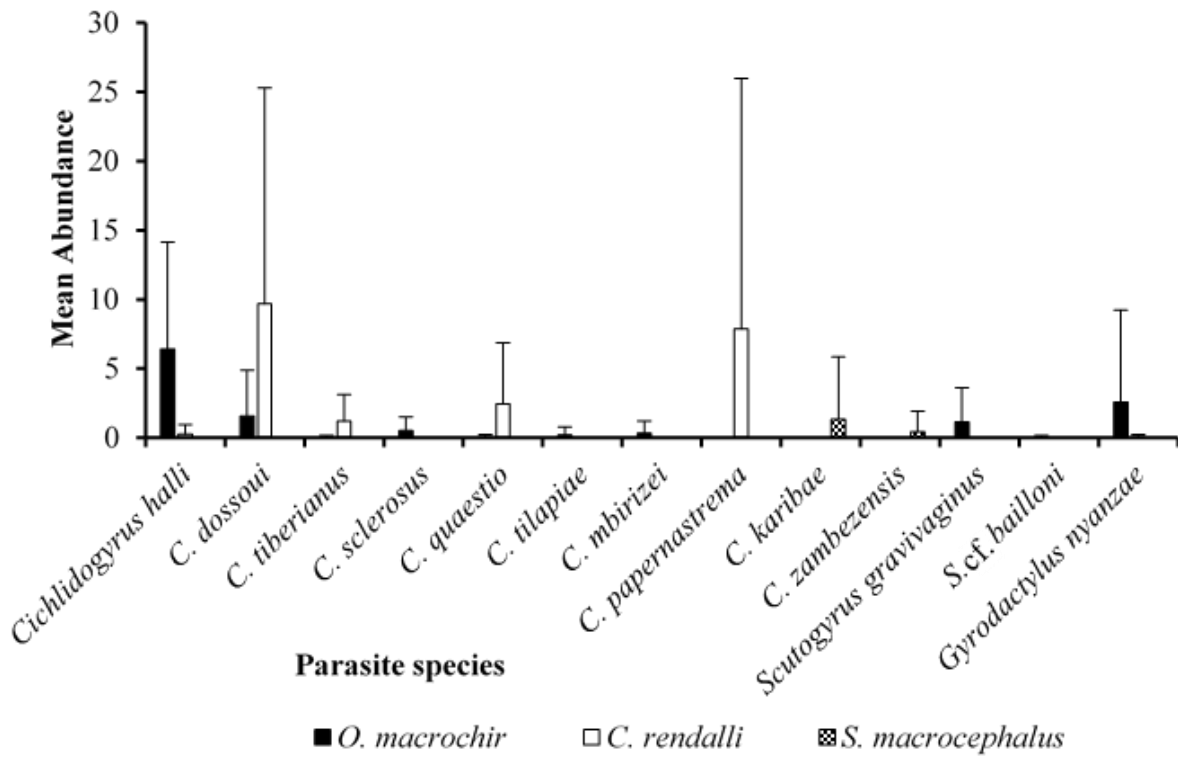

536

537 **Figure 4 :** Mean abundance of each monogenean species recovered on the gills of *Oreochromis*

538 *mweruensis*, *Coptodon rendalli* and *Serranochromis macrocephalus* in the Upper Lufira basin,

539 with standard deviation

540

541 **Table 1** : The monogenean parasite species recovered from *Oreochromis mweruensis*, *Coptodon*  
 542 *rendalli* and *Serranochromis macrocephalus* in the Upper Lufira basin

| Parasite order | Parasite genus       | Parasite species                                | Host species         | # hosts<br>examined | # hosts<br>infected |
|----------------|----------------------|-------------------------------------------------|----------------------|---------------------|---------------------|
| Dactylogyridea | <i>Cichlidogyrus</i> | <i>C. halli</i> (Price & Kirk,<br>1937)         | <i>O. mweruensis</i> | 45                  | 39                  |
|                |                      |                                                 | <i>C. rendalli</i>   | 29                  | 4                   |
|                |                      | <i>C. dossoui</i> Douëllou,<br>1993             | <i>O. mweruensis</i> | 45                  | 19                  |
|                |                      |                                                 | <i>C. rendalli</i>   | 29                  | 25                  |
|                |                      | <i>C. sclerosus</i> Paperna &<br>Thurston, 1969 | <i>O. mweruensis</i> | 45                  | 14                  |
|                |                      | <i>C. tiberianus</i> Paperna,<br>1960           | <i>O. mweruensis</i> | 45                  | 1                   |
|                |                      |                                                 | <i>C. rendalli</i>   | 29                  | 12                  |

| Parasite order | Parasite genus | Parasite species                                                                        | Host species            | # hosts<br>examined | # hosts<br>infected |
|----------------|----------------|-----------------------------------------------------------------------------------------|-------------------------|---------------------|---------------------|
|                |                | <i>C. quaestio</i> Douëllou,<br>1993                                                    | <i>O. mweruensis</i>    | 45                  | 2                   |
|                |                |                                                                                         | <i>C. rendalli</i>      | 29                  | 13                  |
|                |                | <i>C. mbirizei</i> Muterezi<br>Bukinga, Vanhove, Van<br>Steenberge & Pariselle,<br>2012 | <i>O. mweruensis</i>    | 45                  | 9                   |
|                |                | <i>C. tilapiae</i> Paperna,<br>1960                                                     | <i>O. mweruensis</i>    | 45                  | 7                   |
|                |                | <i>C. papernastrema</i> Price,<br>Peebles & Bamford,<br>1969                            | <i>C. rendalli</i>      | 29                  | 15                  |
|                |                | <i>C. karibae</i> Douëllou,<br>1993                                                     | <i>S. macrocephalus</i> | 11                  | 1                   |
|                |                | <i>C. zambezensis</i>                                                                   | <i>S. macrocephalus</i> | 11                  | 1                   |

| Parasite order | Parasite genus               | Parasite species                                     | Host species         | # hosts<br>examined | # hosts<br>infected |
|----------------|------------------------------|------------------------------------------------------|----------------------|---------------------|---------------------|
|                |                              | Douëllou, 1993                                       |                      |                     |                     |
|                | <i>Enterogyrus</i>           | <i>E. malmbergi</i> Bilong<br>Bilong, 1988           | <i>O. mweruensis</i> | 1                   | 1                   |
|                | Paperna, 1963                |                                                      |                      |                     |                     |
|                | <i>Scutogyrus</i>            | <i>S. gravivaginus</i> (Paperna<br>& Thurston, 1969) | <i>O. mweruensis</i> | 45                  | 20                  |
|                | Pariselle and<br>Euzet, 1995 |                                                      |                      |                     |                     |
|                |                              | <i>S. cf. bailloni</i> Pariselle<br>& Euzet, 1995    | <i>O. mweruensis</i> | 45                  | 1                   |
| Gyrodactylidea | <i>Gyrodactylus</i> Von      | <i>G. nyanzae</i> Paperna,<br>1973                   | <i>O. mweruensis</i> | 45                  | 12                  |
|                | Nordmann, 1832               |                                                      |                      |                     |                     |
|                | Bychowsky,<br>1937           |                                                      | <i>C. rendalli</i>   | 29                  | 1                   |

543

544



545 **Table 2** : X/Y: Number of specimens of a given parasite species, out of the number of infected  
 546 fish per host according to sampling period [August, September (Sept.): dry season; March, April:  
 547 rainy season]

*Oreochromis mweruensis*

| Monogenean species             | Sampling date |               |               |                |               |
|--------------------------------|---------------|---------------|---------------|----------------|---------------|
|                                | Sept.<br>2015 | March<br>2016 | April<br>2016 | August<br>2016 | Sept.<br>2017 |
| <i>Cichlidogyrus dossoui</i>   | 7/5           | 17/3          | 22/7          | 13/1           | 16/3          |
| <i>C. halli</i>                | 40/11         | 51/5          | 61/10         | 3/2            | 150/11        |
| <i>C. mbirizei</i>             |               |               | 2/2           |                | 14/7          |
| <i>C. quaestio</i>             | 1/1           |               | 1/1           |                |               |
| <i>C. sclerosus</i>            | 2/1           | 1/1           | 9/7           |                | 13/5          |
| <i>C. tiberianus</i>           |               |               | 1/1           |                |               |
| <i>C. tilapiae</i>             | 1/1           | 2/1           | 3/3           |                | 2/2           |
| <i>Gyrodactylus nyanzae</i>    | 26/4          |               | 23/1          |                | 67/7          |
| <i>Scutogyrus gravivaginus</i> | 5/4           | 5/3           | 28/6          | 7/2            | 9/5           |
| <i>S. cf. bailloni</i>         |               |               | 1/1           |                |               |

|                                                   |       |       |       |        |       |
|---------------------------------------------------|-------|-------|-------|--------|-------|
| Total number of monogeneans, all species included | 82    | 76    | 151   | 23     | 271   |
| Number of examined fish                           | 12    | 5     | 13    | 2      | 13    |
| <i>Coptodon rendalli</i>                          |       |       |       |        |       |
| Sampling date                                     | Sept. | March | April | August | Sept. |
| Monogenean species                                | 2015  | 2016  | 2016  | 2016   | 2017  |
| <i>Cichlidogyrus dossoui</i>                      | 41/8  | 44/6  | 170/8 | 33/2   | 2/1   |
| <i>C. halli</i>                                   | 1/1   |       | 6/3   |        |       |
| <i>C. papernastrema</i>                           | 7/6   |       | 149/5 | 50/2   | 5/2   |
| <i>C. quaestio</i>                                | 38/7  | 21/3  | 22/2  |        | 1/1   |
| <i>C. tiberianus</i>                              | 4/3   | 3/2   | 22/5  | 3/2    |       |
| <i>Gyrodactylus nyanzae</i>                       | 1/1   |       |       |        |       |
| Total number of monogeneans, all species included | 92    | 68    | 369   | 86     | 8     |

|                         |    |   |   |   |   |
|-------------------------|----|---|---|---|---|
| Number of examined fish | 10 | 6 | 8 | 2 | 3 |
|-------------------------|----|---|---|---|---|

---

*Serranochromis macrocephalus*

---

| Sampling date | Sept. | August |
|---------------|-------|--------|
|               | 2017  | 2018   |

---

Monogenean  
species

---

*Cichlidogyrus karibae* 15/1

*C. zambenzensis* 5/1

---

Total number of 20

monogeneans, all species

include

---

|                         |   |    |
|-------------------------|---|----|
| Number of examined fish | 1 | 10 |
|-------------------------|---|----|

---
